# Supplementary material for: TNFα-induced Up-regulation of Ascl2 Affects the Differentiation and Proliferation of Neural Stem Cells
Source: Aging Dis. 2019 Dec 1;10(6):1207–20. doi: 10.14336/AD.2018.1028 (PMC6844591; doi:10.14336/AD.2018.1028)
Supplement: Supplementary file 1 [file AD-10-6-1207-s.pdf]

## SUPPLEMENTARY DATA

# **TNF $\alpha$ -induced Up-regulation of *Ascl2* Affects the Differentiation and Proliferation of Neural Stem Cells**

**Zhongfeng Liu<sup>1,2,3</sup>, Xuan Wang<sup>1,2,3</sup>, Kewen Jiang<sup>4</sup>, Xunming Ji<sup>5</sup>, Y. Alex Zhang<sup>1,\*</sup>, Zhiguo Chen<sup>1,2,3,\*</sup>**

<sup>1</sup>Cell Therapy Center, Beijing Institute of Geriatrics, Xuanwu Hospital, Capital Medical University, and Key Laboratory of Neurodegeneration, Ministry of Education, Beijing, China

<sup>2</sup>Center of Neural Injury and Repair, Beijing Institute for Brain Disorders, Beijing, China

<sup>3</sup>Center of Parkinson's Disease, Beijing Institute for Brain Disorders, Beijing, China

<sup>4</sup>Department of Neurology, the Children's Hospital School of Medicine, Zhejiang University, Hangzhou, China

<sup>5</sup>Department of Neurosurgery, Xuanwu Hospital, Capital Medical University, Beijing, China

# SUPPLEMENTARY DATA

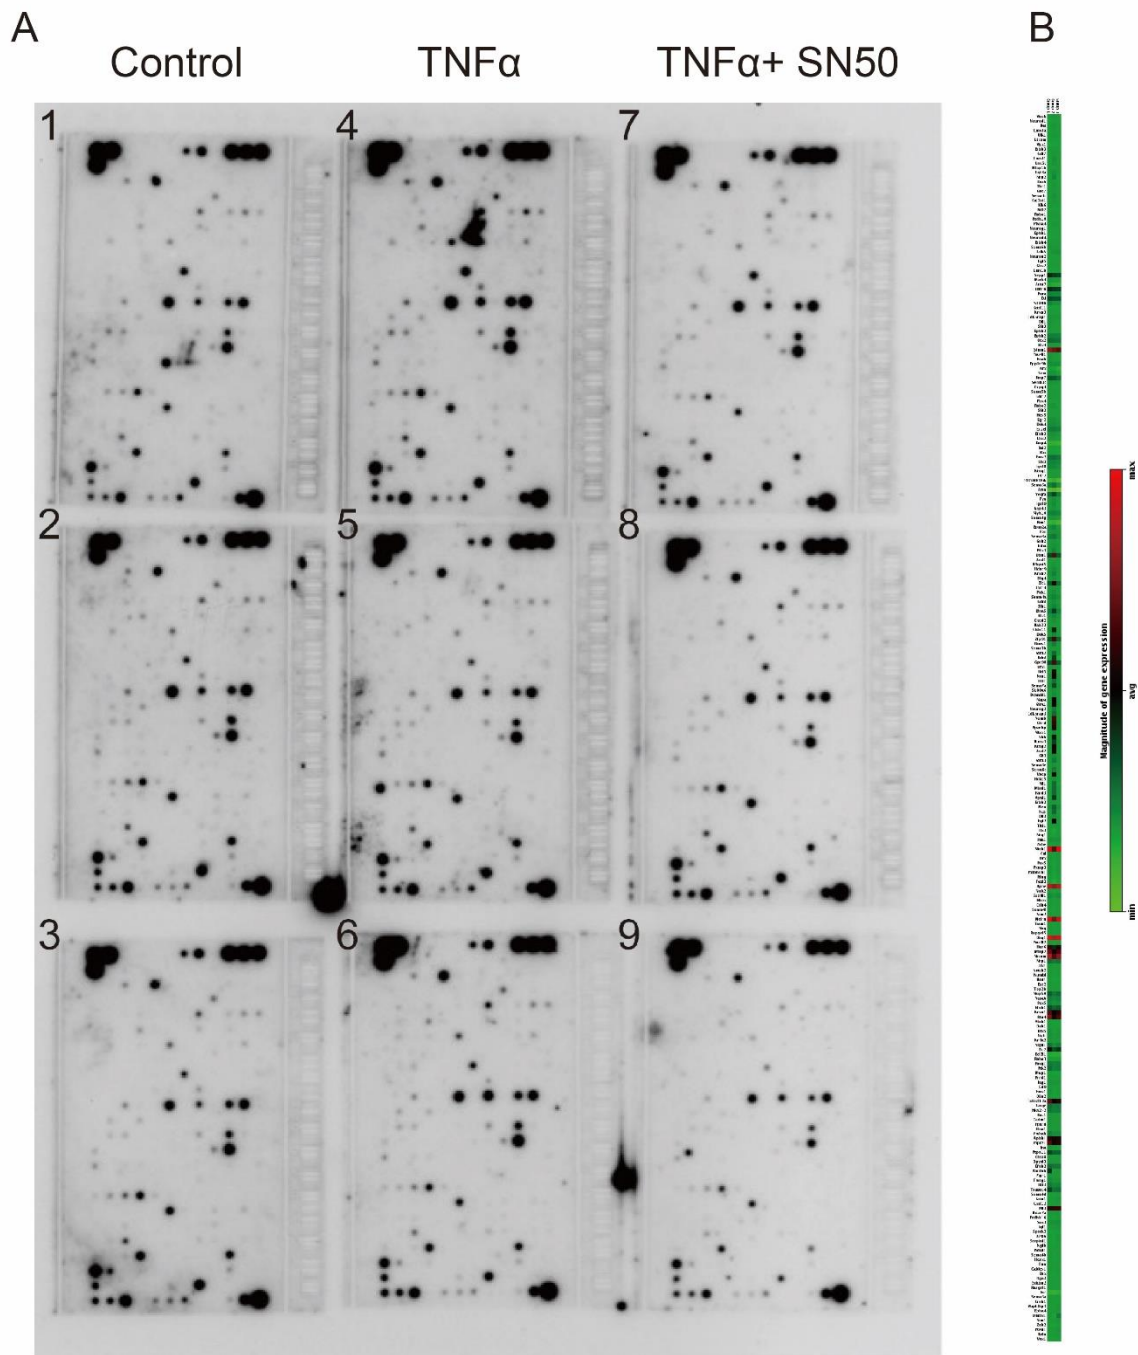

**Supplementary Figure 1. Transcriptional changes in stem cell-related genes downstream of TNF $\alpha$  treatment in murine NSCs cultured in a differentiation condition. Related to Figure 1. (A) NSCs of passage number 7 were cultured as monolayer in a differentiation medium. 1, 2, and 3 refer to control group without TNF $\alpha$  treatment; 4, 5, and 6 refer to NSCs treated with 20 ng/ml TNF $\alpha$  for 5 h; 7, 8, and 9 refer to NSCs treated with 20 ng/ml TNF $\alpha$  and 50ug/ml SN50 for 5 h. (n=3). (B) Heatmap shows expression of 281 genes related to neural stem cells plus internal control *Gapdh* in the three groups.**

# SUPPLEMENTARY DATA

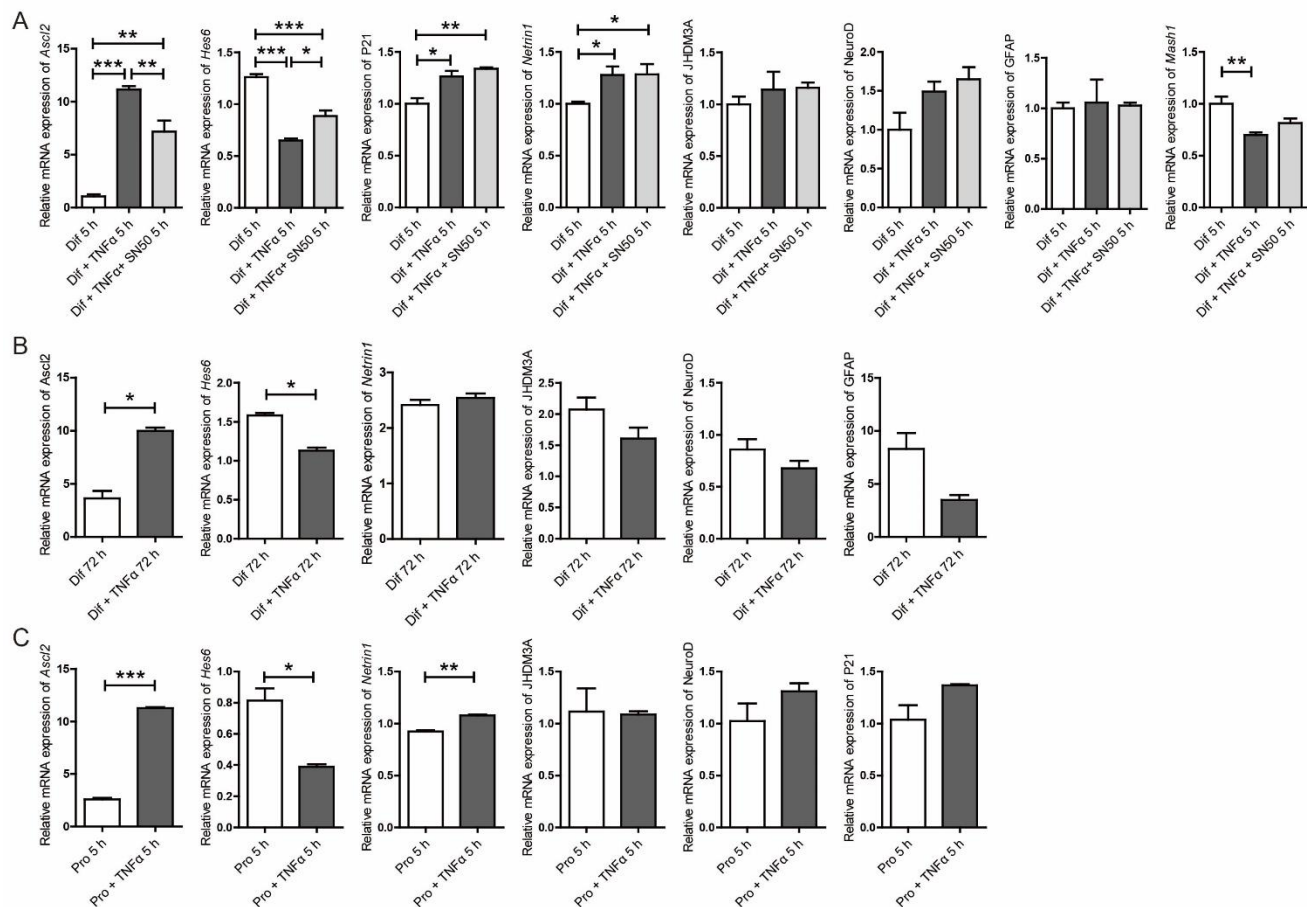

**Supplementary Figure 2. qPCR quantification of the mRNA expression levels for *Ascl2*, *Hes6*, *P21*, *Netrin1*, *JHDM3A*, *NeuroD*, *GFAP*, and *Mash1* under different conditions. (A) Differentiation condition for 5 h with or without TNF $\alpha$  and SN50. (n=3). (B) Differentiation condition for 72 h with or without TNF $\alpha$ . (n=3). (C) Proliferation condition for 5 h with or without TNF $\alpha$ . (n=3).**

## SUPPLEMENTARY DATA

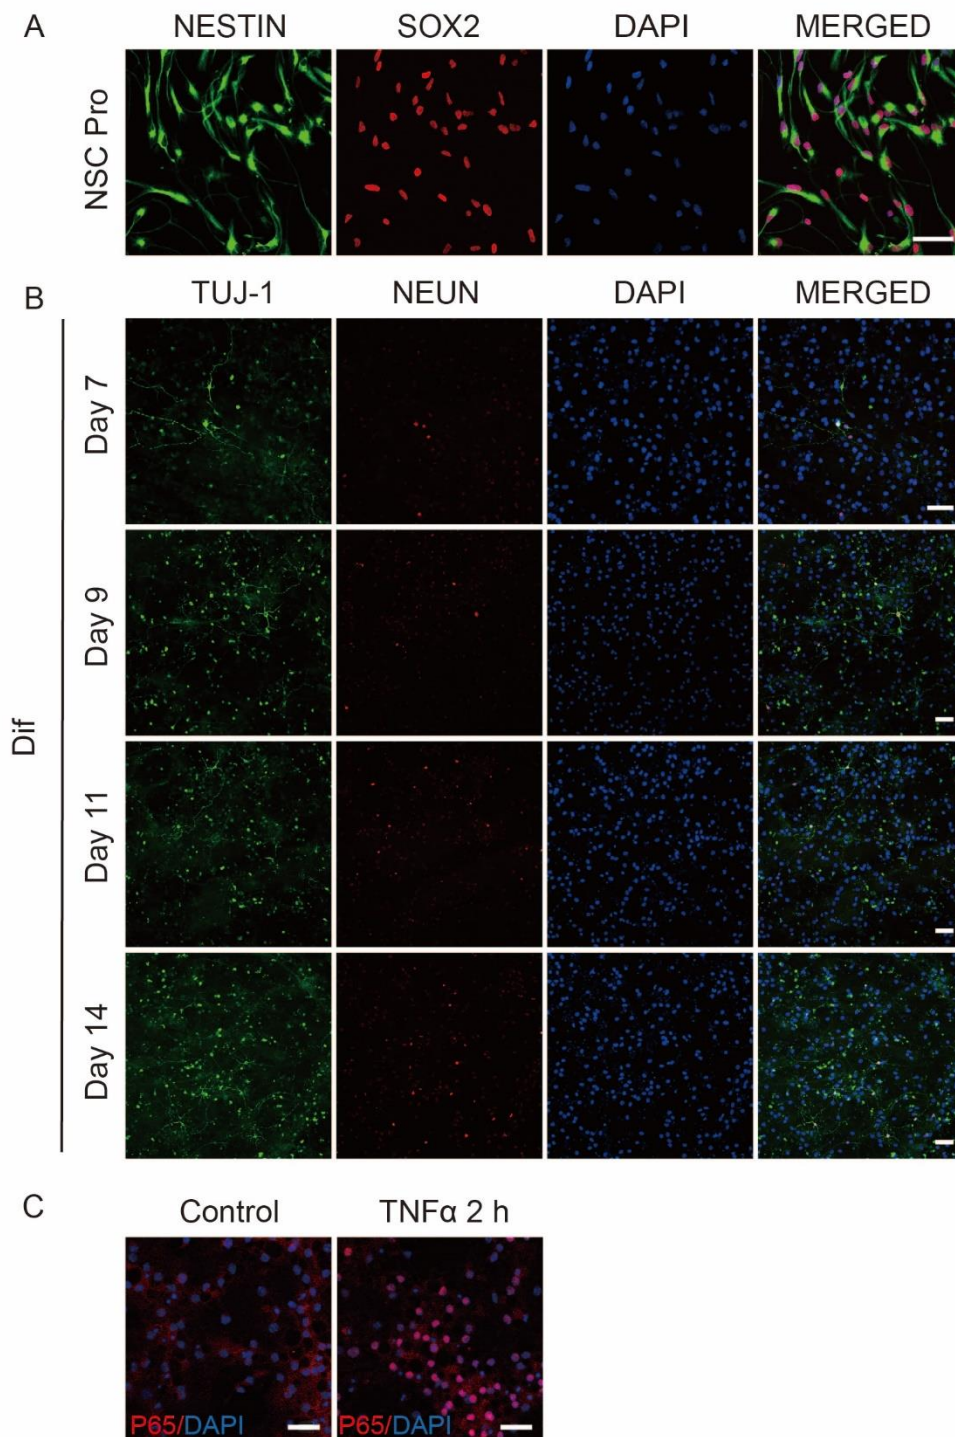

**Supplementary Figure 3. Characterization of neural stem cells and activation of NF- $\kappa$ B pathway after TNF $\alpha$  treatment.** (A) Monolayer murine NSCs were cultured in proliferation medium, and the cells were positive for NSC markers NESTIN and SOX2. Pro, proliferation. Scale bars, 50  $\mu$ m. (B) Monolayer murine NSCs were subjected to a differentiation condition for 7, 9, 11 and 14 days. Early neuronal marker TUJ-1 and mature neuron marker NEUN were stained. Dif, differentiation. Scale bars, 50  $\mu$ m. (C) Monolayer murine NSCs were treated with TNF $\alpha$  (20 ng/ml) for 2 h. After TNF $\alpha$  treatment, NF- $\kappa$ B translocated from cytoplasm to nucleus, as evidenced by P65 staining.

## SUPPLEMENTARY DATA

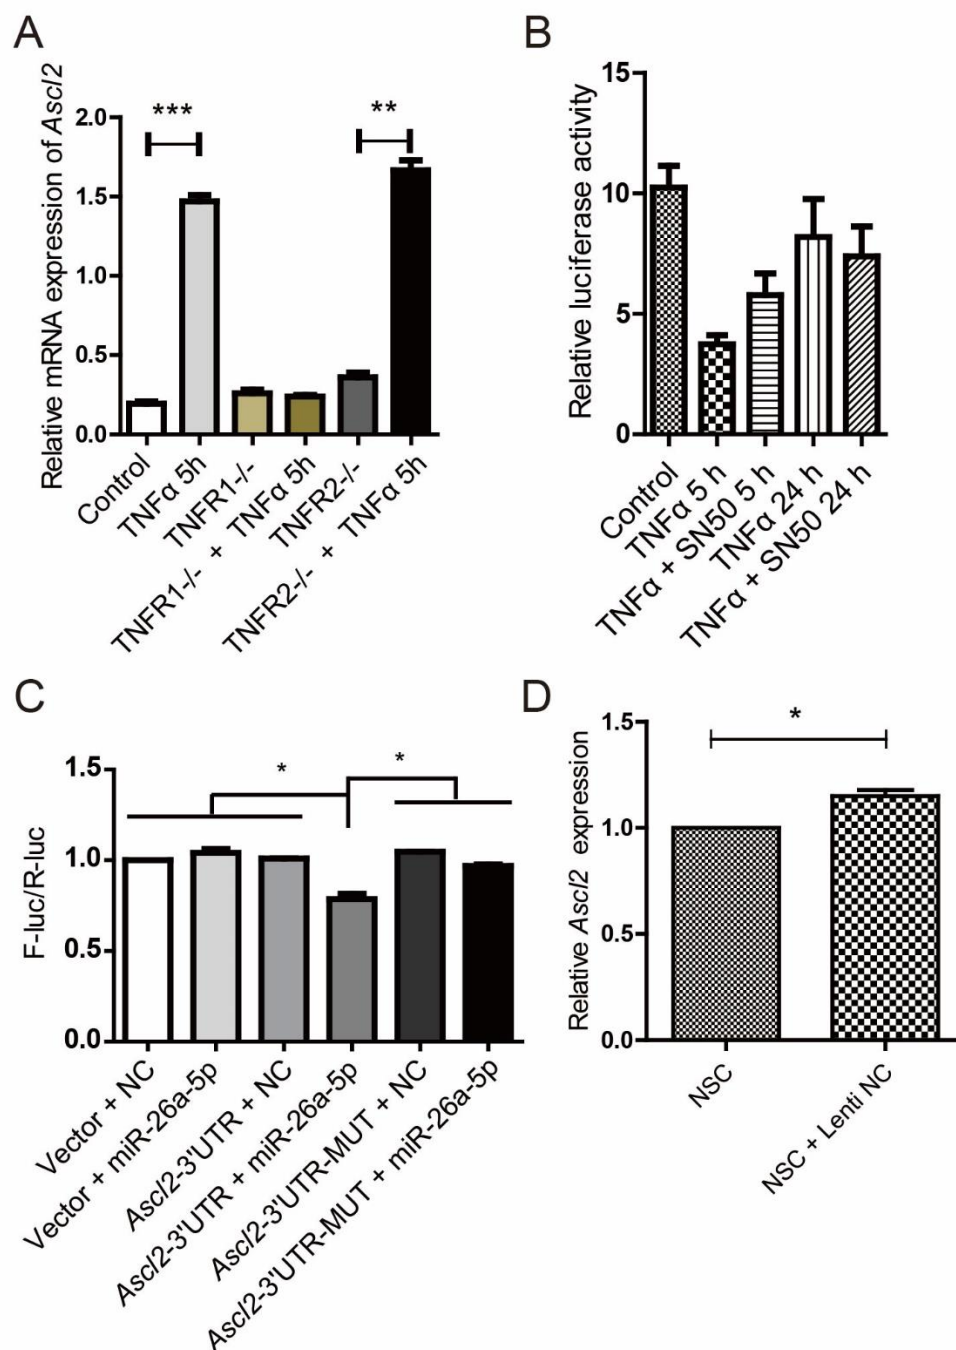

**Supplementary Figure 4. Expression levels of *Ascl2* after TNFα, miRNA, and virus treatment.** (A) NSCs isolated from TNFR1<sup>-/-</sup> and TNFR2<sup>-/-</sup> mice were used to determine whether TNFR1 or TNFR2 was involved in regulation of *Ascl2* by TNFα. *Ascl2* expression level analyzed by realtime PCR. (n=3). (B) NSCs cells were transfected with pGL3-*Ascl2* Promoter (-968 to +444bp) together with Renilla vector. The next day treat cells with TNFα and/or SN50 for 5 h or 24 h. 24 h after treatment, the cells are lysed for Dual luciferase assay. Firefly luciferase activities were examined and normalized to Renilla luciferase activities. (n=3). (C) 293T cells were transfected with empty control vectors, *Ascl2* 3'UTR luciferase construct or *Ascl2* 3'UTR mutation luciferase construct together with miR-26a-5p mimics. Forty-eight hours following transfection, cells were collected and lysed. Firefly luciferase activities were examined and normalized to Renilla luciferase activities. (n=3). (D) *Ascl2* expression increased in NSCs infected with lentivirus. (n=3).

## SUPPLEMENTARY DATA

*Asc/2* promotor sequence cloned into pGL3 vector

>NC\_000073.6:142968537-142969943 *Mus musculus* strain C57BL/6J chromosome 7, GRCm38.p4 C57BL/6J

```
AGCACACTTCTGGGACAATGGGGCAAACTGAGACTTTGACAAGGTCAGTGCATTTCC
CTTCCCCTTCAACCTTCCCTCCACCGGCCTCAGGGGAAGGATGGGACTGAGAGGTCT
GCTGGAATCCGAAGAAGTGTATTGAACAAAAAGTCCAGGAACCGAACAAAACTAGT
CTGGGTAGATTACCATTAGGAAAAGAGACCCAGACTTGGAGAGCTGGCTGTAAGGTG
CAGATGGGTGACAGTGTGAGAAAGGAGTGGACTTGATTGTATTCTCTCAGGTCAGGGC
AACCGGTCCTGGGGATTCTTGAAAACACAGAGGCATGGGGTGTGCATGAGGGGCTAA
ATGGGTACAGGTGCCCAGGAACATGAAATTCCCATTACTGGTCTGAACCACTCCTCA
AGCCCTTCTCACACTCAAGGGGACACAGGTGTGCTCCTGCAATGCGTGGACACCGGG
TCCTGGTGGAGGAGCAGGGTGGGGCGGAGTGGGCGTGGAGCCTTGTGCGAGACAC
TCCCCCATCTCTGGAGCCACGCGCCAGGCGTACGCTTCTTCTGGCCCCGGCATAGG
ACCGCGCCAATTGTCATTGGCCAAACGGGCGATCCCAGATTGGCTGAGACCCCGGCT
CCCGCCTCCTCCGCCAGGGGGAGGGACGTGGGTGCGGGTTTGAGGCTCGTGCTACC
CTAGGGGGTTCGCGCTCTTCTGCCTCCTACCTCTTGGTCACCGCAAAGCTTGGTCCGG
TTCTTCATCCGGCTGCAAGCGCTAGGTGTGCGGAGACCTGGCAGCTCTTGGGGCTTA
AGGGCTGAGCACCAGGACGGGTGGAGGTGCCTGTAGAGTACATTCGGACCCTCTCTC
GGACCCTCTCTCAGCCCCTGAGTGTGCGGGACCTGCGGAGCGCAGTTCGGGATCTG
CACTCGAGGATTTTTTCGAGGACGCAATAAGCTAAGCATCTGCCCGGAGCATGGAAGCA
CGTCAGTAGGCCATGAACTGCACCCGGGAGGGGTGGGGGTGGAAGCGCACGGTGTC
AGCTTTGCAGAATGTGTACGCCAAGGGGAGGGTGAAGCGTGGCGGGAGGGCGAGGC
GAAGGAAGGAGGGCGTGAGAAAGGAGGCGGTGGCGGGCGGAGGAGAGTTATCTATA
CTTTTAAAAAAAAGGAGCCGCTTGAGCCGCGTAAAGGGAGACTTGGGGAGCGCCTG
ACAGCACGCGCGGGACACGAGAGTACCACGCTTCCCTACTCTTTCAGACCTTGACTG
GTACGGGGTCCCAGGACTGCAGGAGGCCAGCGACGCGTGCCCTAGGGAGTCCTGCA
GCAGTGCCCTGCCTGAGGCCCGTGAAGGTGCAAACGTCCACTTCCCACCGCACCCG
GTTCTCGCGAGCACTTTTCTGTGCCGCACCAGAACTC
```

Predicted NFκB Binding site: **CATGAAATTCCCAT**; Transcript start site: **G**

**Supplementary Figure 5. Luciferase Reporter Assay.** Software LASAGNA-Search 2.0 predicts a NF-κB binding site in *Asc/2* promotor.

# SUPPLEMENTARY DATA

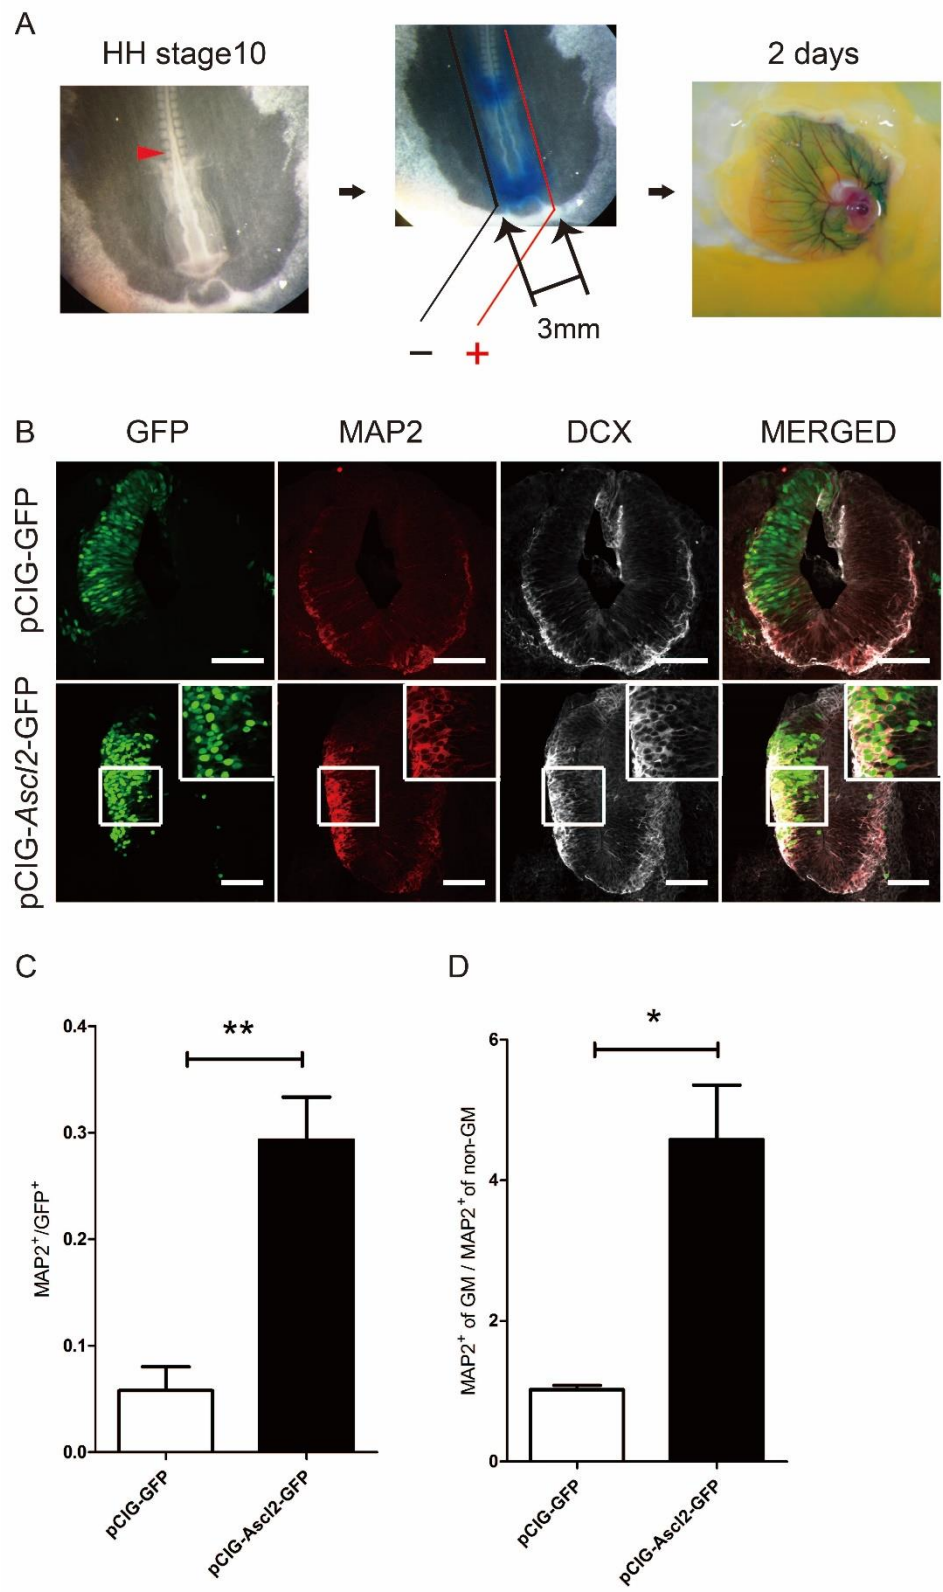

**Supplementary Figure 6. The impact of *Ascl2* overexpression on NSC differentiation *in ovo*. Related to Figure 7. (A) Schematic representation of *in ovo* electroporation of *Ascl2*. (B) Expression of neuronal marker MAP2 at 24 h post-electroporation. (C) Proportion of MAP-positive cells among GFP-positive cells. (n=6). (D) Rate of MAP-positive cells of genetically modified (GM) side over non-genetically modified (non-GM) side. (n=6)**

# SUPPLEMENTARY DATA

**Supplementary Table 1.** Primer sequences used for quantitative real time PCR. Related to Figure 1 and supplementary Figure 2.

| Gene ID                        | Primer sequence (5' to 3') | Product Size(bp) |
|--------------------------------|----------------------------|------------------|
| Gapdh:<br>NM_138654.3          | TCAACAGCAACTCCCACTCTTCCA   | 117              |
|                                | ACCACCCTGTTGCTGTACCGTATT   |                  |
| Pten:<br>NM_008960.2           | AATCCCAGTCAGAGGCGCTATGT    | 137              |
|                                | GATTGCAAGTTCCGCCACTGAACA   |                  |
| Ascl2:<br>NM_008554            | ACCTGCTTCTAGCCCAAGAAACCT   | 139              |
|                                | TGCAAGGTCCGGAAGATGGAAGAT   |                  |
| NeuroD:<br>NM_010894.2         | ACCTTGCTACTCCAAGACCCAGAA   | 139              |
|                                | TTTGCAGAGCGTCTGTACGAAGGA   |                  |
| GFAP:<br>NM_001131020          | GGAAATTGCTGGAGGGCGAAGAAA   | 163              |
|                                | TGGTGAGCCTGTATTGGGACAACCT  |                  |
| P21: NM_007669                 | TTGTACAAGGAGCCAGGCCAAGAT   | 119              |
|                                | ACCCACTAAGTGCTTTGACACCCA   |                  |
| Mash-1: NM_008553              | ACGACTTGAACCTCTATGGCGGGTT  | 100              |
|                                | AAGTCCAGCAGCTCTTGTTCCTCT   |                  |
| JHDM3A:<br>NM_172382           | GGCTTCAACCATGGCTTCAACTGT   | 194              |
|                                | TCAATAACCGTGCTGTCCTTCCCA   |                  |
| Hes6:<br>NM_019479             | TCACTGAAGCTGCTCCTCGTTTGT   | 80               |
|                                | ATTCGGTTGGAGCATCGATGGGAT   |                  |
| Ascl2 promotor:<br>NC_000073.6 | CGCGGTACCTTGAGAGCACACTTCTG | 1407             |
|                                | CGCGGGATCCTACGAGTTCTGGTGC  |                  |

Note: the red part indicates kpnI and BamHI site respectively.

**Supplementary Table 2.** Primers and probes for miR-26a-5p Taqman quantitative real-time PCR. Related to Figure 2.

|                  |    |                             |
|------------------|----|-----------------------------|
| U6               | FO | ATTGGAACGATACAGAGAAGATT     |
|                  | RE | GGAACGCTTCACGAATTTG         |
|                  | PR | TGCGCAAGGATGACACGCA         |
| mmu-miR-26a-5p   | FO | TCGCCGTTCAAGTAATCCAG        |
|                  | RE | CAGAGCAGGGTCCGAGGTA         |
|                  | PR | ACCCGAGAGCCTATCCTGGA        |
| mmu-miR-26b-5p   | FO | CGCCGTTCAAGTAATTCAGG        |
|                  | RE | CAGAGCAGGGTCCGAGGTA         |
|                  | PR | CGTTCGCTCTGGACCCGAGAC       |
| mmu-miR-26b-3p   | FO | CAGTGCTGCCTGTTCTCCATTAC     |
|                  | RE | TATGGTTGTTACGACTCCTTCAC     |
|                  | PR | CCCTATCCAACCATAACAGACGAGCC  |
| mmu-miR-26a-1-3p | FO | CAGTGCTGCCTATTCTTGATTAC     |
|                  | RE | TATGGTTGTTACGACTCCTTCAC     |
|                  | PR | CCCTATCCAACCATAACAGACCGTGC  |
| mmu-miR-26a-2-3p | FO | CAGTGCTGCCTGTTCTTGATTAC     |
|                  | RE | TATGGTTGTTACGACTCCTTCAC     |
|                  | PR | CCCTATCCAACCATAACAGACGAAACA |

Note: FO, forward primer; RE, reverse primer; PR, probe.
